# Supplementary material
Source: PubMed Central journal article supplement (PMC3418820)
Supplement: NIHMS362015-supplement-1.pdf [file NIHMS362015-supplement-1.pdf]

## Online Appendix 1: Wilson-Patterson Attitude Inventory

Here is a list of various topics. Please indicate whether or not you agree with each topic by circling Yes or No as appropriate. If you are uncertain, please circle ?. Again, the best answer is usually the one which comes to mind first, so just give us your first reaction and don't spend too long on any one topic.

- |                         | 1   | 2 | 3  |                          | 1   | 2 | 3  |
|-------------------------|-----|---|----|--------------------------|-----|---|----|
| (1) Death penalty.....  | Yes | ? | No | (15) Immigration.....    | Yes | ? | No |
| (2) Astrology.....      | Yes | ? | No | (16) Capitalism.....     | Yes | ? | No |
| (3) X-rated movies..... | Yes | ? | No | (17) Segregation.....    | Yes | ? | No |
| (4) Modern art.....     | Yes | ? | No | (18) Moral majority..... | Yes | ? | No |
| (5) Women's liberation. | Yes | ? | No | (19) Pacifism.....       | Yes | ? | No |
| (6) Foreign aid.....    | Yes | ? | No | (20) Censorship.....     | Yes | ? | No |
| (7) Federal housing.... | Yes | ? | No | (21) Nuclear power.....  | Yes | ? | No |
| (8) Democrats.....      | Yes | ? | No | (22) Living together.... | Yes | ? | No |
| (9) Military drill..... | Yes | ? | No | (23) Republicans.....    | Yes | ? | No |
| (10) The draft.....     | Yes | ? | No | (24) Divorce.....        | Yes | ? | No |
| (11) Abortion.....      | Yes | ? | No | (25) School prayer.....  | Yes | ? | No |
| (12) Property tax.....  | Yes | ? | No | (26) Unions.....         | Yes | ? | No |
| (13) Gay rights.....    | Yes | ? | No | (27) Socialism.....      | Yes | ? | No |
| (14) Liberals.....      | Yes | ? | No | (28) Busing.....         | Yes | ? | No |
